# Supplementary material
Source: HighWire-hosted journal article supplement (https://ebmtp.com/highwire/filestream/136128/field_highwire_adjunct_files/0/heatwole_85_2136.pdf)
Supplement: heatwole_85_2136.pdf [file heatwole_85_2136.pdf]

# 2型肌强直性营养不良症患者生活质量 (PRISM-2)

Chad Heatwole, MD,MSCI;Nicholas Johnson, MD;Rita Bode, PhD;Jeanne Dekdebrun, MS;  
Nuran Dilek, MS;James E. Hilbert, MS;Elizabeth Luebbe, MS;William Martens, BA;Michael P. McDermott,PhD;  
Christine Quinn, MS;Nan Rothrock, PhD;Charles Thornton, MD;Barbara G. Vickrey, MD,MPH;  
David Victorson, PhD;Richard T. Moxley III,MD

**目的：**旨在研究 2 型肌强直性营养不良症(myotonic dystrophy type 2, DM2)对患者生活造成最严重不良影响的症状的发作频次和相对重要性,鉴别与 DM2 症状相关性最强的因素。

**方法：**通过横断面研究纳入在全国 DM2 患者注册中心登记的 DM2 成年患者,评估 DM2 的 310 个症状和 21 个症状类别在 DM2 患者中出现的频次和相对重要性。所有分析数据包括患者年龄、性别、受教育程度、就业状况和症状的持续时间。

**结果：**DM2 中最常见的症状是活动能力丧失(94.4%)、移动或行走能力受限(89.2%)、臀部/大腿或膝关节无力(89.2%)、易疲劳(89.2%)和肌强直(82.6%)。受试者认为活动能力丧失和易疲劳是 DM2 对患者生活造成不良影响的最主要的症状类别。更高的 DM2 症状发作的平均频次还与 DM2 患者的失业率增加、DM2 症状持续时间延长和较低的受教育程度具有相关性( $p < 0.01$ )。更高的 DM2 症状发作的平均影响与 DM2 患者的失业率增加、DM2 症状持续时间延长、性别和年龄增加具有相关性( $p < 0.01$ )。

**结论：**DM2 患者的生活被多种症状影响。DM2 的这些症状在 DM2 患者中和不同的 DM2 亚群患者中具有不同水平的显著性和发作频次。[Neurology® 2015;85:2136–2146](#)
